# Supplementary material for: Young Adults’ Lived Experiences with Cancer-Related Cognitive Impairment: An Exploratory Qualitative Study
Source: MDPI journal article supplement (doi:10.3390/curroncol30060422), 2023-06-09
Supplement: s1 [file s1]

**Supplemental File 1:**  
***Consolidated Criteria for Reporting Qualitative Research (COREQ) Checklist***

A checklist of items that should be included in reports of qualitative research. Manuscript sections are provided corresponding to where authors consider each of the items listed in this checklist can be found. If the information is not included, the item is noted as “N/A.”

| Item #                                         | Item                                     | Description                                                                                                                                                 | Manuscript Section                          |
|------------------------------------------------|------------------------------------------|-------------------------------------------------------------------------------------------------------------------------------------------------------------|---------------------------------------------|
| <b>Domain 1: Research Team and Reflexivity</b> |                                          |                                                                                                                                                             |                                             |
| <i>Personal Characteristics</i>                |                                          |                                                                                                                                                             |                                             |
| 1                                              | Interviewer/ Facilitator                 | Which author/s conducted the interview or focus group?                                                                                                      | Interviewer                                 |
| 2                                              | Credentials                              | What were the researcher’s credentials? E.g. PhD, MD                                                                                                        | Design                                      |
| 3                                              | Occupation                               | What was their occupation at the time of the study?                                                                                                         | Design                                      |
| 4                                              | Gender                                   | Was the researcher male or female?                                                                                                                          | Design                                      |
| 5                                              | Experience and Training                  | What experience or training did the researcher have?                                                                                                        | Interviewer                                 |
| <i>Relationship with Participants</i>          |                                          |                                                                                                                                                             |                                             |
| 6                                              | Relationship Established                 | Was a relationship established prior to study commencement?                                                                                                 | N/A                                         |
| 7                                              | Participant Knowledge of the Interviewer | What did the participants know about the researcher (e.g., personal goals, reasons for doing the research)?                                                 | N/A                                         |
| 8                                              | Interviewer Characteristics              | What characteristics were reported about the interviewer/facilitator (e.g., bias, assumptions, reasons and interests in the research topic)?                | N/A                                         |
| <b>Domain 2: Study Design</b>                  |                                          |                                                                                                                                                             |                                             |
| <i>Theoretical Framework</i>                   |                                          |                                                                                                                                                             |                                             |
| 9                                              | Methodological orientation and theory    | What methodological orientation was stated to underpin the study (e.g., grounded theory, discourse analysis, ethnography, phenomenology, content analysis)? | N/A                                         |
| <i>Participant Selection</i>                   |                                          |                                                                                                                                                             |                                             |
| 10                                             | Sampling                                 | How were participants selected (e.g., purposive, convenience, consecutive, snowball)?                                                                       | Participants and Procedures                 |
| 11                                             | Method of Approach                       | How were participants approached (e.g., face-to-face, telephone, mail, email)?                                                                              | Participants and Procedures                 |
| 12                                             | Sample Size                              | How many participants were in the study?                                                                                                                    | Participants and Procedures/<br>Sample Size |
| 13                                             | Non-Participation                        | How many people refused to participate or dropped out? What were the reasons for this?                                                                      | Participants and Procedures                 |
| <i>Setting</i>                                 |                                          |                                                                                                                                                             |                                             |
| 14                                             | Setting of Data Collection               | Where was the data collected (e.g., home, clinic, workplace)?                                                                                               | Interviews                                  |
| 15                                             | Presence of Non-Participants             | Was anyone else present besides the participants and researchers?                                                                                           | Interviews                                  |
| 16                                             | Description of Sample                    | What are the important characteristics of the sample (e.g., demographic data, date)?                                                                        | Sample                                      |
| <i>Data Collection</i>                         |                                          |                                                                                                                                                             |                                             |

|                                        |                                |                                                                                                                                    |                       |
|----------------------------------------|--------------------------------|------------------------------------------------------------------------------------------------------------------------------------|-----------------------|
| 17                                     | Interview Guide                | Were questions, prompts, guides provided by the authors? Was it pilot tested?                                                      | Interviewer           |
| 18                                     | Repeat Interviews              | Were repeat interviews carried out? If yes, how many?                                                                              | N/A                   |
| 19                                     | Audio/Visual Recording         | Did the research use audio or visual recording to collect the data?                                                                | Interviews            |
| 20                                     | Field Notes                    | Were field notes made during and/or after the interview or focus group?                                                            | Interviews            |
| 21                                     | Duration                       | What was the duration of the interviews or focus group?                                                                            | Interviews            |
| 22                                     | Data Saturation                | Was data saturation discussed?                                                                                                     | Data Analysis         |
| 23                                     | Transcripts Returned           | Were transcripts returned to participants for comment and/or correction?                                                           | Data Analysis         |
| <b>Domain 3: Analysis and Findings</b> |                                |                                                                                                                                    |                       |
| <i>Data Analysis</i>                   |                                |                                                                                                                                    |                       |
| 24                                     | Number of Data Coders          | How many data coders coded the data?                                                                                               | Data Analysis         |
| 25                                     | Description of the Coding Tree | Did authors provide a description of the coding tree?                                                                              | N/A                   |
| 26                                     | Derivation of Themes           | Were themes identified in advance or derived from the data?                                                                        | Data Analysis         |
| 27                                     | Software                       | What software, if applicable, was used to manage the data?                                                                         | Data Analysis         |
| 28                                     | Participant Checking           | Did participants provide feedback on the findings?                                                                                 | Data Analysis         |
| <i>Reporting</i>                       |                                |                                                                                                                                    |                       |
| 29                                     | Quotations Presented           | Were participant quotations presented to illustrate the themes/findings? Was each quotation identified (e.g., participant number)? | Themes                |
| 30                                     | Data and Findings Consistent   | Was there consistency between the data presented and the findings?                                                                 | Themes/<br>Discussion |
| 31                                     | Clarity of Major Themes        | Were major themes clearly presented in the findings?                                                                               | Themes/<br>Discussion |
| 32                                     | Clarity of Minor Themes        | Is there a description of diverse cases or discussion of minor themes?                                                             | Themes/<br>Discussion |

**Developed from:** Tong, A., Sainsbury, P., & Craig, J. (2007). Consolidated criteria for reporting qualitative research (COREQ): A 32-item checklist for interviews and focus groups.

*International Journal for Quality in Health Care*, 19(6), 349–357.

<https://doi.org/10.1093/intqhc/mzm042>
